# Supplementary material for: Cationic, luminescent cyclometalated iridium(iii) complexes based on substituted 2-phenylthiazole ligands
Source: Royal Society of Chemistry journal article supplement (doi:10.1039/c4dt03054k), 2014-12-11
Supplement: c4dt03054k1.pdf [file c4dt03054k1.pdf]

## Cationic, luminescent cyclometalated iridium(III) complexes based on substituted 2-phenylthiazole ligands

Emily C. Stokes,<sup>a</sup> Emily E. Langdon-Jones,<sup>a</sup> Lara M. Groves, James A. Platts,<sup>a</sup> Peter N. Horton,<sup>b</sup> Ian A. Fallis,<sup>a</sup> Simon J. Coles<sup>b</sup> and Simon J.A. Pope<sup>a\*</sup>

### Electronic Supplementary Information

#### Additional details of synthesis

##### Ethyl-4-methyl-2-phenylthiazole-5-carboxylate (emptzH)<sup>1</sup>

Thiobenzamide (2.000 g, 14.57 mmol) and ethyl 4-chloroacetoacetate (2.380 g, 14.46 mmol) in ethanol (30 mL) were heated at reflux for 4 h. After cooling, the solvent was removed *in vacuo*. The crude product was extracted into CH<sub>2</sub>Cl<sub>2</sub>, washed with aqueous NaHCO<sub>3</sub> solution and water, and then dried over MgSO<sub>4</sub>. After removal of solvent, the residue was recrystallised from hot methanol. Yield: 2.45 g, 68 %. <sup>1</sup>H NMR (400 MHz, CDCl<sub>3</sub>): δ<sub>H</sub> = 7.90-7.88 (2H, m), 7.39-7.37 (3H, m), 4.29 (2H, q, <sup>3</sup>J<sub>HH</sub> = 7.1 Hz, CH<sub>2</sub>CH<sub>3</sub>), 2.71 (3H, s, CCH<sub>3</sub>), 1.32 (3H, t, <sup>3</sup>J<sub>HH</sub> = 7.1 Hz, CH<sub>2</sub>CH<sub>3</sub>) ppm. UV-Vis (CH<sub>3</sub>CN) λ<sub>max</sub>/nm (ε/M<sup>-1</sup>cm<sup>-1</sup>) = 310 (18300), 225 (12500). IR (solid): ν 1711 (C=O), 1263 (C-O) cm<sup>-1</sup>.

##### Ethyl-dipyrido[3,2-a:2',3'-c]phenazine-11-carboxylate (edppz)<sup>2</sup>

1,10-Phenanthroline-5,6-dione (0.224 g, 1.06 mmol) was dissolved in ethanol (10 mL), ethyl-1,2-phenylenediamine-4-carboxylate (0.19 mL, 1.13 mmol) and acetic acid (approx. 3 drops) were added and the solution stirred at 80°C for 24 h under a N<sub>2</sub> atmosphere. The solvent was removed *in vacuo*, the resulting solid dissolved in CHCl<sub>3</sub> and the product precipitated by slow addition of petroleum ether to give a pale brown solid. Yield: 0.220 g, 59%. <sup>1</sup>H NMR (250 MHz, CDCl<sub>3</sub>): δ<sub>H</sub> = 9.50 (2H, dd, J<sub>HH</sub> = 8.1, 1.7 Hz), 9.22-9.19 (2H, m), 8.95 (1H, app d, <sup>3</sup>J<sub>HH</sub> = 1.8 Hz, NCCHC), 8.41 (1H, dd, J<sub>HH</sub> = 8.9, 1.8 Hz), 8.26 (1H, d, <sup>3</sup>J<sub>HH</sub> = 8.9 Hz), 7.72 (2H, dd, <sup>3</sup>J<sub>HH</sub> = 8.1, 4.5 Hz, NCHCH), 4.47 (2H, q, <sup>3</sup>J<sub>HH</sub> = 7.1 Hz, OCH<sub>2</sub>CH<sub>3</sub>), 1.46 (3H, t, <sup>3</sup>J<sub>HH</sub> = 7.1 Hz, OCH<sub>2</sub>CH<sub>3</sub>) ppm. UV/Vis (CH<sub>3</sub>CN): λ<sub>max</sub>/nm (ε/M<sup>-1</sup>cm<sup>-1</sup>) = 385 (13800), 367 (13500), 275 (57700).

##### Ethyl-3,6-dimethyl-dipyrido[3,2-a:2',3'-c]phenazine-11-carboxylate (edmdppz)

Prepared similarly to **edppz**, but using 2,9-dimethyl-1,10-phenanthroline-5,6-dione (0.301 g, 1.26 mmol) and ethyl-1,2-phenylenediamine-4-carboxylate (0.231 g, 1.28 mmol) to give a pale brown solid. Yield: 0.145 g, 30%. <sup>1</sup>H NMR (250 MHz, CDCl<sub>3</sub>): δ<sub>H</sub> = 9.42 (2H, d, <sup>3</sup>J<sub>HH</sub> = 8.3 Hz), 9.00 (1H, app. d, <sup>3</sup>J<sub>HH</sub> = 1.4 Hz), 8.40 (1H, app. dd, J<sub>HH</sub> = 8.9, 1.8 Hz), 8.26 (1H, d, <sup>3</sup>J<sub>HH</sub> = 9.0 Hz), 7.59 (2H, d, <sup>3</sup>J<sub>HH</sub> = 8.2 Hz), 4.46 (2H, q, <sup>3</sup>J<sub>HH</sub> = 7.1 Hz, OCH<sub>2</sub>CH<sub>3</sub>), 2.92 (6H, s, CH<sub>3</sub>), 1.45 (3H, t, <sup>3</sup>J<sub>HH</sub> = 7.1 Hz, OCH<sub>2</sub>CH<sub>3</sub>) ppm. UV/Vis (CH<sub>3</sub>CN): λ<sub>max</sub>/nm (ε/M<sup>-1</sup>cm<sup>-1</sup>) = 390 (11800), 371 (11300), 278 (41800). IR (solid): ν 1717 (C=O), 1271 (C-O) cm<sup>-1</sup>.

##### Pyridylimidazo[4,5-f][1,10]phenanthroline (pipphen)<sup>3</sup>

1,10-phenanthroline-5,6-dione (0.814 g, 3.96 mmol) and ammonium acetate (9.411 g, 122 mmol) were heated to 70 °C in AcOH (40 mL) under a N<sub>2</sub> atmosphere. 4-pyridine carboxaldehyde (0.36 mL, 3.82 mmol) in AcOH (20 mL) was added and the solution stirred at 70-80 °C for 2 h. The reaction was then cooled to room temperature, neutralised with NaOH (1M) and extracted with CH<sub>2</sub>Cl<sub>2</sub>. The organic layer was dried over MgSO<sub>4</sub> and the solvent was removed *in vacuo* to give the crude product. Reprecipitation from CH<sub>2</sub>Cl<sub>2</sub> and Et<sub>2</sub>O gave the product as a brown solid. Yield: 0.602g, 52%. <sup>1</sup>H NMR (400 MHz, CDCl<sub>3</sub>): δ<sub>H</sub> = 9.21-9.19 (2H, m, NCH), 8.89 (1H, dd, J<sub>HH</sub> = 8.1, 1.8 Hz), 8.84 (2H, dd, J<sub>HH</sub> = 4.5, 1.6 Hz), 8.65 (1H, dd, J<sub>HH</sub> = 8.2, 1.7 Hz), 8.15 (2H, dd, <sup>3</sup>J<sub>HH</sub> = 4.5, 1.6 Hz), 7.76-7.72 (2H, m, NCHCH) ppm. UV/Vis (CH<sub>3</sub>CN): λ<sub>max</sub>/nm (ε/M<sup>-1</sup>cm<sup>-1</sup>) = 322 (12700), 271 (27200).

### 1-Phenylpyridylimidazo[4,5-f][1,10]phenanthroline (ppiphen)

Adapted from literature, but using 1,10-phenanthroline-5,6-dione (0.203 g, 0.96 mmol), 4-pyridine carboxaldehyde (0.1 mL, 1.06 mmol), aniline (0.1 mL, 1.10 mmol) and ammonium acetate (0.739 g, 9.59 mmol) were stirred in AcOH (5 mL) at 125°C for 4 h under an N<sub>2</sub> atmosphere. The reaction was cooled, poured over ice water and neutralised with NaOH (approx. 10%). Hypochlorite solution (approx. 15%) was added to remove impurities and the product extracted into CH<sub>2</sub>Cl<sub>2</sub>. The combined organic phases were dried over MgSO<sub>4</sub> and the solvent removed *in vacuo* to give a dark yellow oil. The crude product was recrystallised from MeCN to give a pale brown solid. Yield: 0.125 g, 35%. <sup>1</sup>H NMR (250 MHz, CDCl<sub>3</sub>): δ<sub>H</sub> = 9.07 (1H, dd, J<sub>HH</sub> = 8.1, 1.8 Hz), 9.01 (2H, dd, J<sub>HH</sub> = 4.3, 1.6 Hz), 8.51 (2H, dd, J<sub>HH</sub> = 4.6, 1.6 Hz), 7.74-7.62 (5H, m), 7.53-7.50 (2H, m), 7.42-7.36 (3H, m) ppm. UV/Vis (CH<sub>3</sub>CN): λ<sub>max</sub>/nm (ε/M<sup>-1</sup>cm<sup>-1</sup>) = 275 (42200), 243 (29800). IR (solid): ν 3036 (C-H), 1593 (C=C), 700 (=C-H) cm<sup>-1</sup>.

### 1-(4-*t*-Butyl)-phenylpyridylimidazo[4,5-f][1,10]phenanthroline (bpiphen)

Prepared similarly to **ppiphen**, but using 1,10-phenanthroline-5,6-dione (0.504 g, 2.40 mmol), 4-pyridine carboxaldehyde (0.22 mL, 2.34 mmol), 4-*t*-butyl-aniline (0.38 mL, 2.39 mmol) and ammonium acetate (1.873 g, 24.3 mmol) in AcOH (10 mL) to give the product as a pale brown solid. Yield: 0.039 g, 32%. <sup>1</sup>H NMR (250 MHz, CDCl<sub>3</sub>): δ<sub>H</sub> 9.13 (1H, dd, J<sub>HH</sub> = 4.4, 1.7 Hz), 9.05 (1H, dd, J<sub>HH</sub> = 8.1, 1.8 Hz), 9.00 (1H, dd, J<sub>HH</sub> = 4.3, 1.6 Hz), 8.50-8.47 (2H, m), 7.70 (1H, dd, <sup>3</sup>J<sub>HH</sub> = 8.1, 4.4 Hz), 7.65-7.61 (2H, m), 7.41-7.37 (5H, m), 7.25 (1H, dd, J<sub>HH</sub> = 8.4, 4.3 Hz), 1.42 (9H, s, CH<sub>3</sub>) ppm. UV/Vis (CH<sub>3</sub>CN): λ<sub>max</sub>/nm (ε/M<sup>-1</sup>cm<sup>-1</sup>) = 274 (42200), 243 (35500). IR (solid): ν 2963 (C-H), 745, 677 (=C-H) cm<sup>-1</sup>.

**Table S1** . Crystal data and structure refinement details.

|                                                                                    | <b>[Ir(emptz)<sub>2</sub>(dpphen)](PF<sub>6</sub>)</b>                                              |
|------------------------------------------------------------------------------------|-----------------------------------------------------------------------------------------------------|
| <b>Empirical formula</b>                                                           | C <sub>51</sub> H <sub>42.5</sub> F <sub>6</sub> IrN <sub>4</sub> O <sub>4.25</sub> PS <sub>2</sub> |
| <b>Formula weight</b>                                                              | 1180.68                                                                                             |
| <b>Crystal system</b>                                                              | Triclinic                                                                                           |
| <b>Space group</b>                                                                 | <i>P</i> -1                                                                                         |
| <b><i>a</i> / Å</b>                                                                | 16.3828(11)                                                                                         |
| <b><i>b</i> / Å</b>                                                                | 16.9146(11)                                                                                         |
| <b><i>c</i> / Å</b>                                                                | 18.4938(13)                                                                                         |
| <b><math>\alpha</math> / °</b>                                                     | 87.307(5)                                                                                           |
| <b><math>\beta</math> / °</b>                                                      | 74.660(5)                                                                                           |
| <b><math>\gamma</math> / °</b>                                                     | 77.226(5)                                                                                           |
| <b><i>V</i> / Å<sup>3</sup></b>                                                    | 4819.5(6)                                                                                           |
| <b><i>T</i> / K</b>                                                                | 100(2)                                                                                              |
| <b>Density (calculated) / Mg / m<sup>3</sup></b>                                   | 1.627                                                                                               |
| <b>Absorption coefficient / mm<sup>-1</sup></b>                                    | 2.964                                                                                               |
| <b><i>F</i>(000)</b>                                                               | 2354                                                                                                |
| <b>Crystal shape</b>                                                               | Needle                                                                                              |
| <b>Colour</b>                                                                      | Orange                                                                                              |
| <b>Crystal size / m<sup>3</sup></b>                                                | 0.100 × 0.010 × 0.010 mm <sup>3</sup>                                                               |
| <b><i>Z</i></b>                                                                    | 4                                                                                                   |
| <b><math>\theta</math> range for data collection</b>                               | 3.038 – 27.471°                                                                                     |
| <b>Index ranges</b>                                                                | –20 ≤ <i>h</i> ≤ 21,<br>–21 ≤ <i>k</i> ≤ 21,<br>–23 ≤ <i>l</i> ≤ 23                                 |
| <b>Reflections collected</b>                                                       | 59802                                                                                               |
| <b>Independent reflections</b>                                                     | 21687 [ <i>R</i> <sub>int</sub> = 0.0918]                                                           |
| <b>Completeness to <math>\theta</math> = 25.242°</b>                               | 99.2 %                                                                                              |
| <b>Absorption correction</b>                                                       | Semi-empirical from equivalents                                                                     |
| <b>Max. and min. transmission</b>                                                  | 1.000 and 0.788                                                                                     |
| <b>Refinement method</b>                                                           | Full-matrix least-squares on <i>F</i> <sup>2</sup>                                                  |
| <b>Data / restraints / parameters</b>                                              | 21687 / 1367 / 1288                                                                                 |
| <b>Goodness-of-fit on <i>F</i><sup>2</sup></b>                                     | 1.075                                                                                               |
| <b>Final <i>R</i> indices [<i>F</i><sup>2</sup> &gt; 2σ(<i>F</i><sup>2</sup>)]</b> | <i>R</i> 1 = 0.0646,<br><i>wR</i> 2 = 0.1074                                                        |
| <b><i>R</i> indices (all data)</b>                                                 | <i>R</i> 1 = 0.1322,<br><i>wR</i> 2 = 0.1316                                                        |
| <b>Largest diff. peak and hole</b>                                                 | 3.442 and –1.770 e Å <sup>-3</sup>                                                                  |

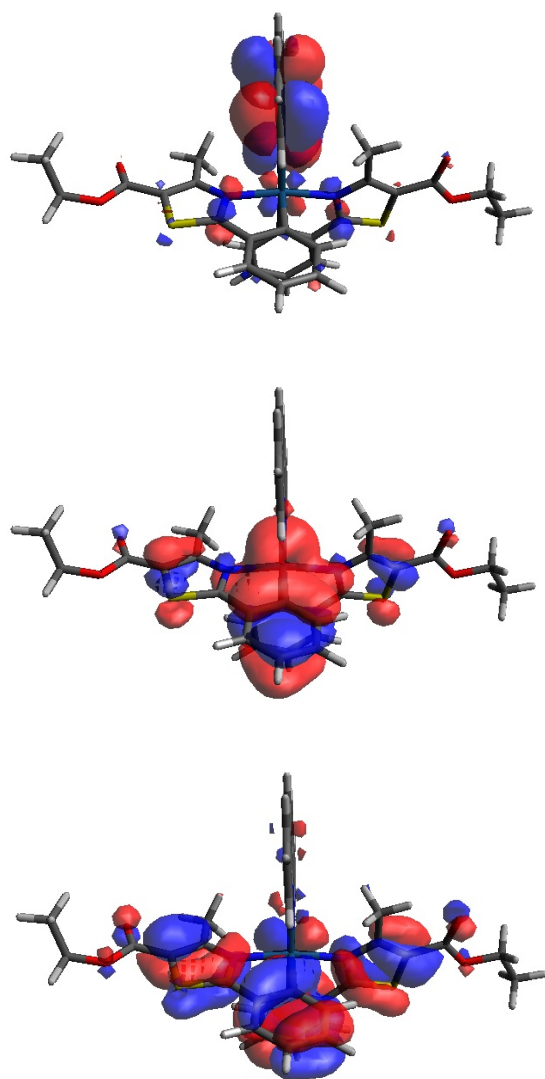

**Figure S1** Visual representations of the HOMO-1 (bottom), HOMO (middle) and LUMO (top) for  $[\text{Ir}(\text{emptyz})_2(\text{phen})]^+$ .

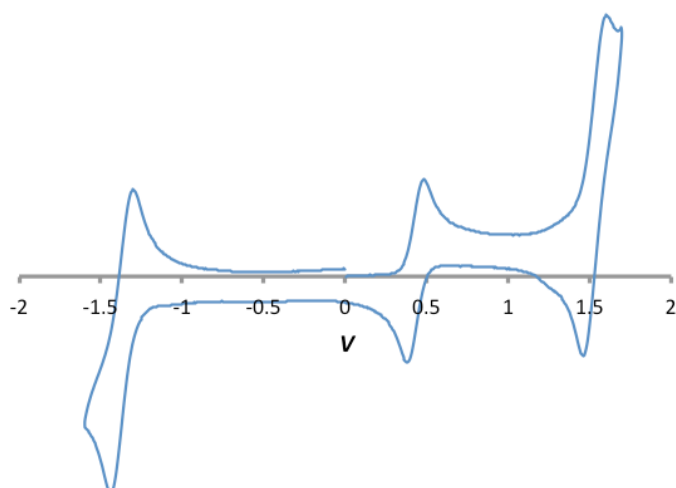

**Figure S2.**  $[\text{Ir}(\text{emptz})_2(\text{bipy})](\text{PF}_6)$  measured in  $\text{CH}_2\text{Cl}_2$  solutions at  $200 \text{ mV s}^{-1}$  with  $0.1 \text{ M } [\text{NBu}_4][\text{PF}_6]$  as supporting electrolyte calibrated with  $\text{Fc}/\text{Fc}^+$ .

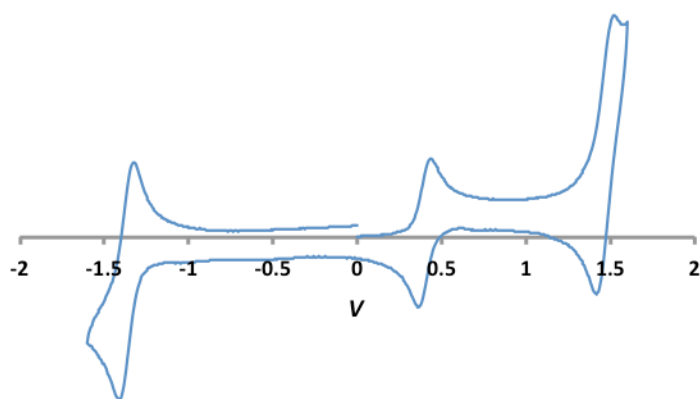

**Figure S3.**  $[\text{Ir}(\text{emptz})_2(\text{dpphen})](\text{PF}_6)$  measured in  $\text{CH}_2\text{Cl}_2$  solutions at  $200 \text{ mV s}^{-1}$  with  $0.1 \text{ M } [\text{NBu}_4][\text{PF}_6]$  as supporting electrolyte calibrated with  $\text{Fc}/\text{Fc}^+$ .

## References

- <sup>1</sup> G. Li, Y. He, W. Zhou, P. Wang, Y. Zhang, W. Tong, H. Wu, M. Liu, X. Ye, Y. Chen, *Heterocycles*, 2014, **89**, 453.
- <sup>2</sup> N. J. Lundin, P. J. Walsh, S. L. Howell, J. J. McGarvey, A. G. Blackman, K. C. Gordon, *Inorg. Chem.*, 2005, **44**, 3551.
- <sup>3</sup> N. N. Sergeeva, M. Donnier-Marechal, G. Vaz, A. M. Davies, M. O. Senge, *J. Inorg. Biochem.*, 2011, **105**, 1589.
